# Supplementary material for: Converting urea into high value-added 2-oxazolidinones under solvent-free conditions
Source: Royal Society of Chemistry journal article supplement (doi:10.1039/c6ra21809a), 2016-01-01

## Converting urea into high value-added 2-oxazolidinones under solvent-free conditions

Peixue Wang,<sup>a,b</sup> Qinghe Li,<sup>a</sup> Shimin Liu,<sup>a</sup> and Youquan Deng<sup>a,b</sup> \*

<sup>a</sup> State Key Laboratory for Oxo Synthesis and Selective Oxidation, State Key Laboratory of Solid Lubrication, Lanzhou Institute of Chemical Physics, Chinese Academy of Sciences, Lanzhou, China, 730000.

<sup>b</sup> Qingdao Center of Resource Chemistry & New Materials, Qingdao, China, 266100.

\* Corresponding author. Tel.: +86-931-4968116; fax: +86-931-4968116.

E-mail address: ydeng@licp.cas.cn

### Experimental

#### Catalysts preparation

All chemicals were purchased from local chemical agents and were of reagent grade without further purification.

The Mg-Zn-Al hydrotalcites (HTMg-Zn-Al) were prepared by co-precipitation method. Solution 1 contained  $\text{Al}(\text{NO}_3)_3 \cdot 9\text{H}_2\text{O}$ ,  $\text{Zn}(\text{NO}_3)_2 \cdot 6\text{H}_2\text{O}$  and  $\text{Mg}(\text{NO}_3)_2 \cdot 6\text{H}_2\text{O}$  were dissolved in distilled water with the molar ratio of  $(\text{Zn} + \text{Mg}):\text{Al} = 3:1$ . Solution 2 contained 2M NaOH and 0.125M  $\text{Na}_2\text{CO}_3$ . Then solution 2 was added to solution 1 under vigorous stirring, the pH was maintained at  $\sim 12$ . The resulting slurry was aged at 60 °C overnight, followed by filtration, washing, and drying at 60 °C for 12 h. The composition of the Mg-Zn-Al hydrotalcite can be altered by varying the ratio of Zn/Mg. Then precursors were calcined at temperatures 400 °C for 4 h, respectively. The resulted catalysts are denoted as  $\text{Mg}_l\text{Zn}_m\text{Al}_n\text{O}$ , l, m, n are molar ratios of Mg, Zn and Al.

#### GC-MS analysis of the products

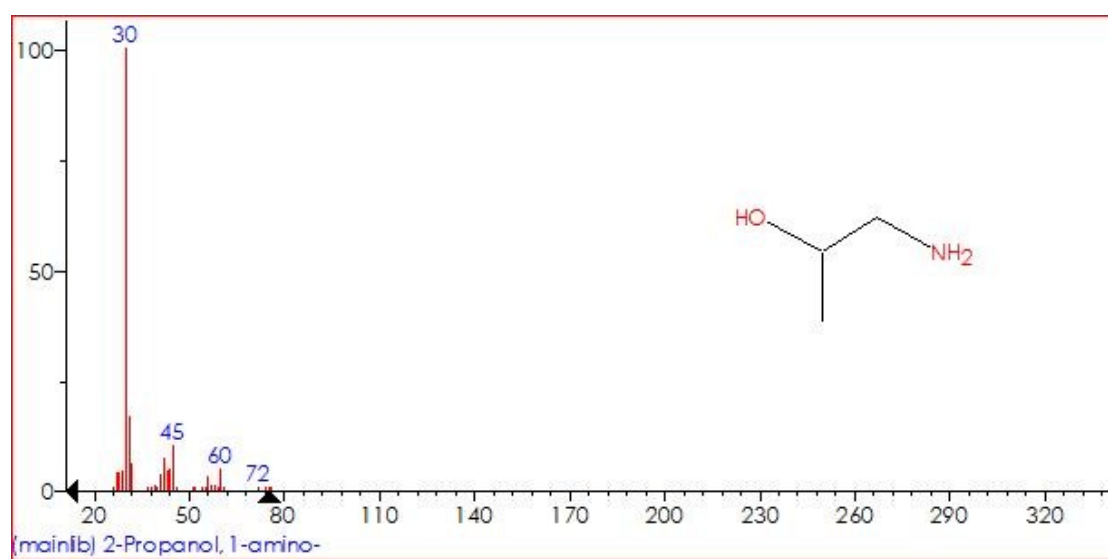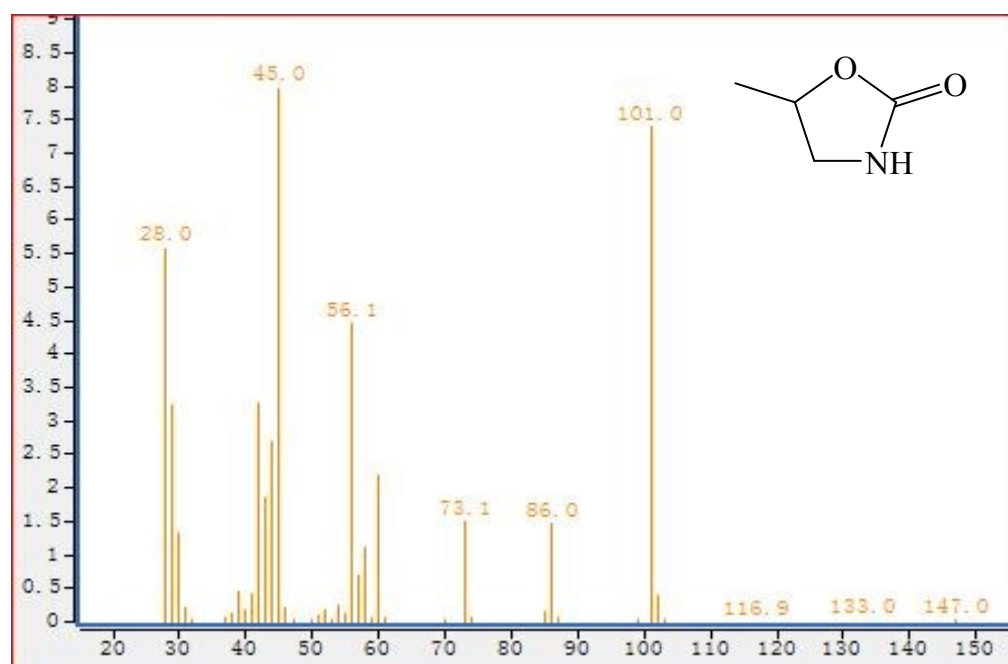

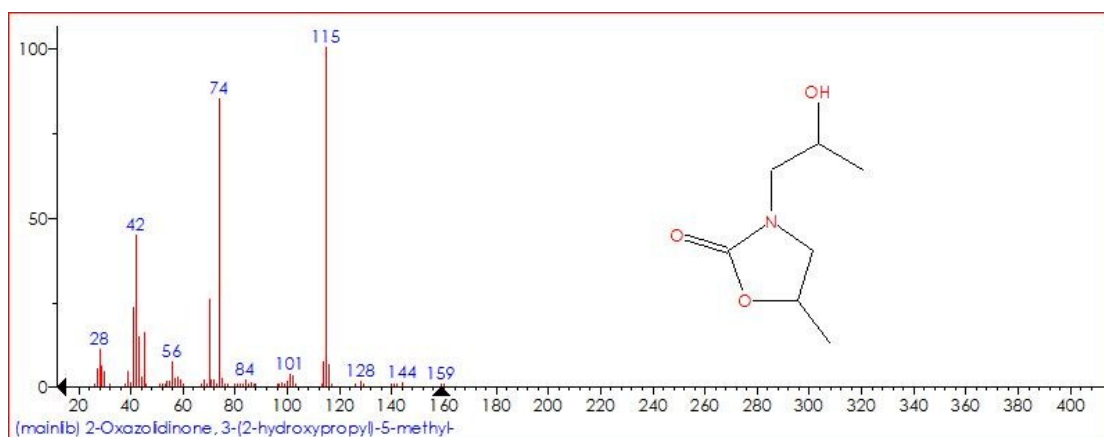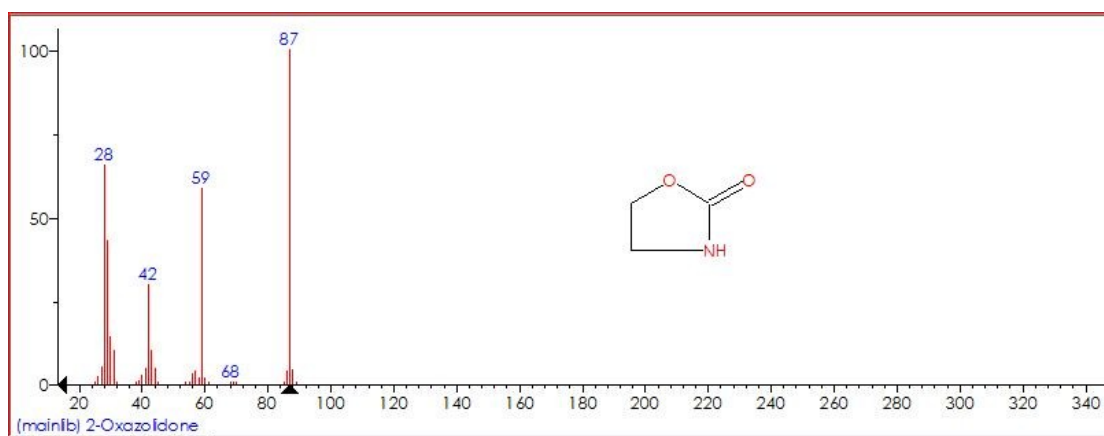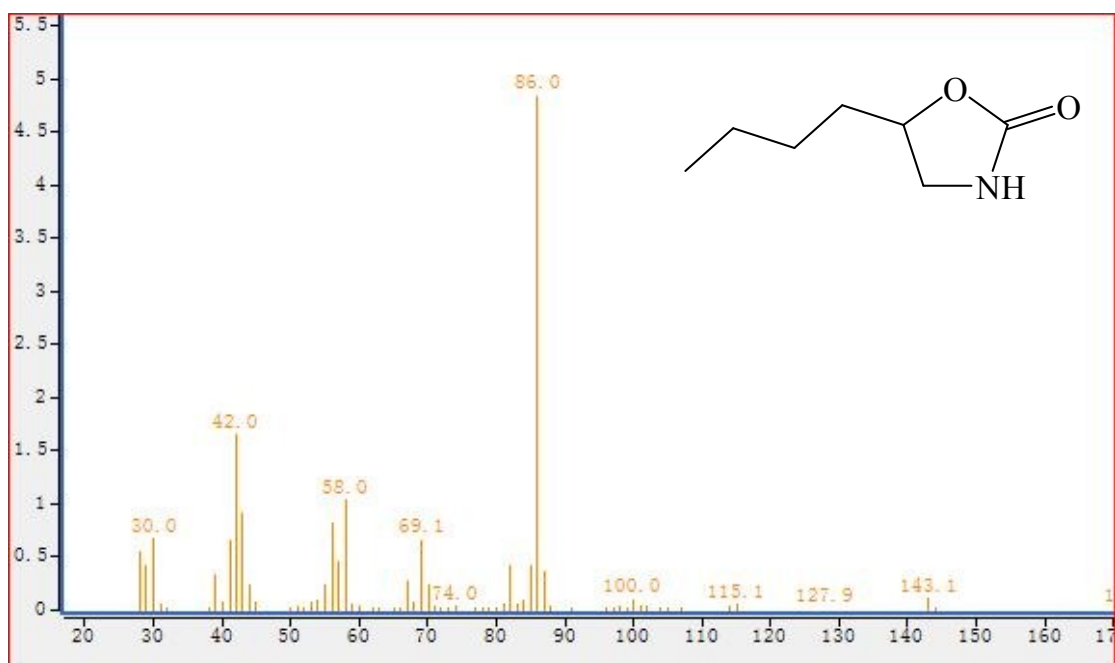

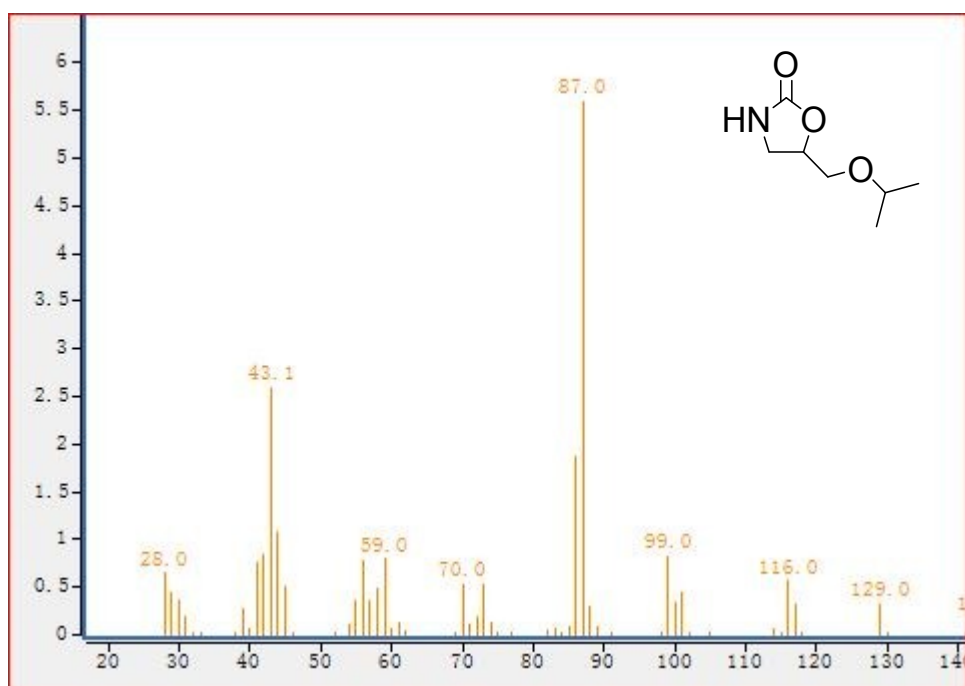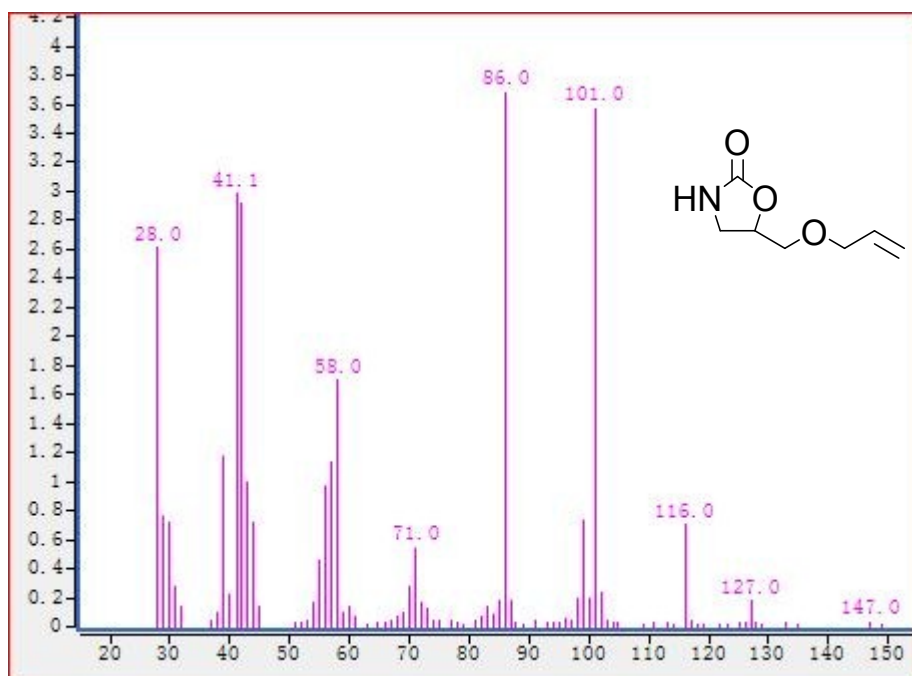

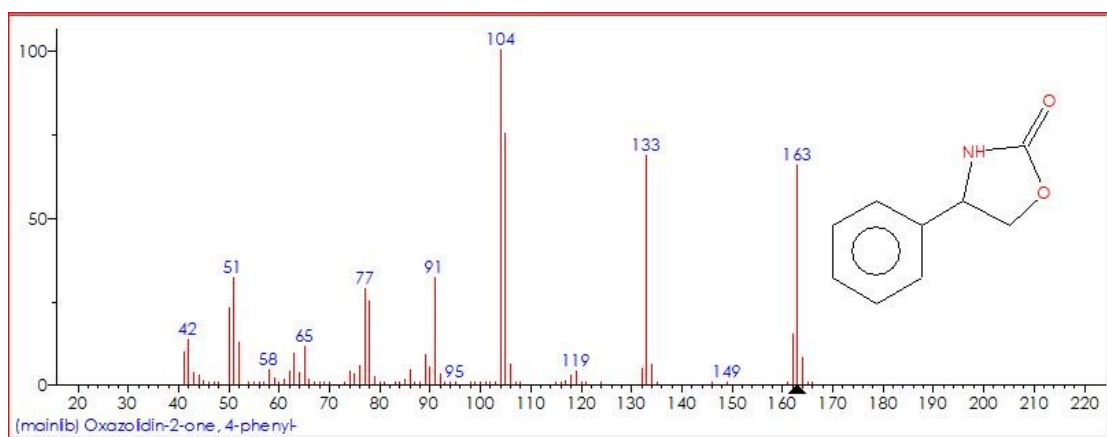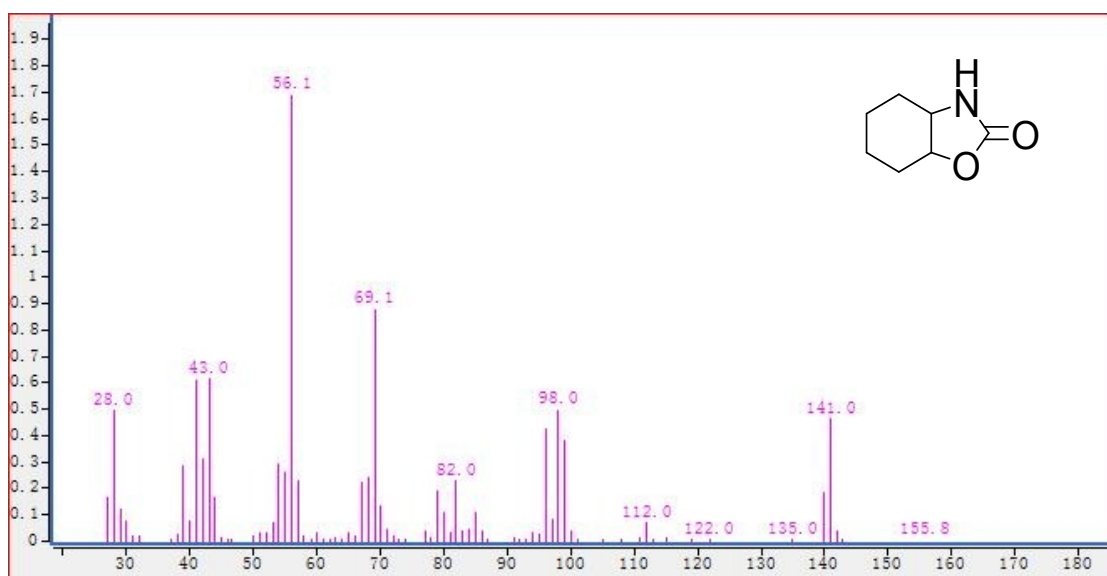

Supplement: c6ra21809a1.pdf [file c6ra21809a1.pdf]
